# Supplementary material for: A facile method to synthesize supported Pd–Au nanoparticles using graphene oxide as the reductant and their extremely high electrocatalytic activity for the electrooxidation of methanol and ethanol
Source: Royal Society of Chemistry journal article supplement (doi:10.1039/c3ta11139c), 2013-01-01
Supplement: c3ta11139c.pdf [file c3ta11139c.pdf]

**A facile method to synthesize supported Pd-Au nanoparticles using graphene oxide as the reductant and their extremely high electrocatalytic activity for the electrooxidation of methanol and ethanol**

Feihui Li<sup>1\*</sup> Yongqin Guo<sup>2</sup> Ruqiang Li<sup>2</sup> Fei Wu<sup>2</sup> Yu Liu<sup>2</sup> Xiying Sun<sup>2</sup>

Chuangbao Li<sup>2</sup> Wei Wang<sup>3</sup> Jianping Gao<sup>1\*</sup>

<sup>1</sup>Department of Applied Chemistry, School of Science, Tianjin University of Commerce, Tianjin 300134; <sup>2</sup>School of Science, Tianjin University, Tianjin 300072; <sup>3</sup>School of Chemical Engineering & Technology, Tianjin University, Tianjin 300072, P R China

---

<sup>1\*</sup> Corresponding author: Fax: +86 22 274 034 75.

E-mail address: jianpinggao66@yahoo.cn (J.P. Gao); tjlifeihui@126.com (F.H. Li).

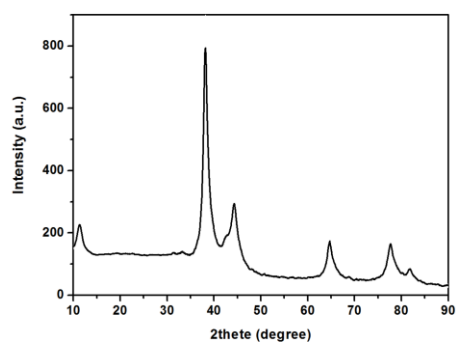

Fig. 1S XRD pattern of Pd-Au(1:1)/GO.

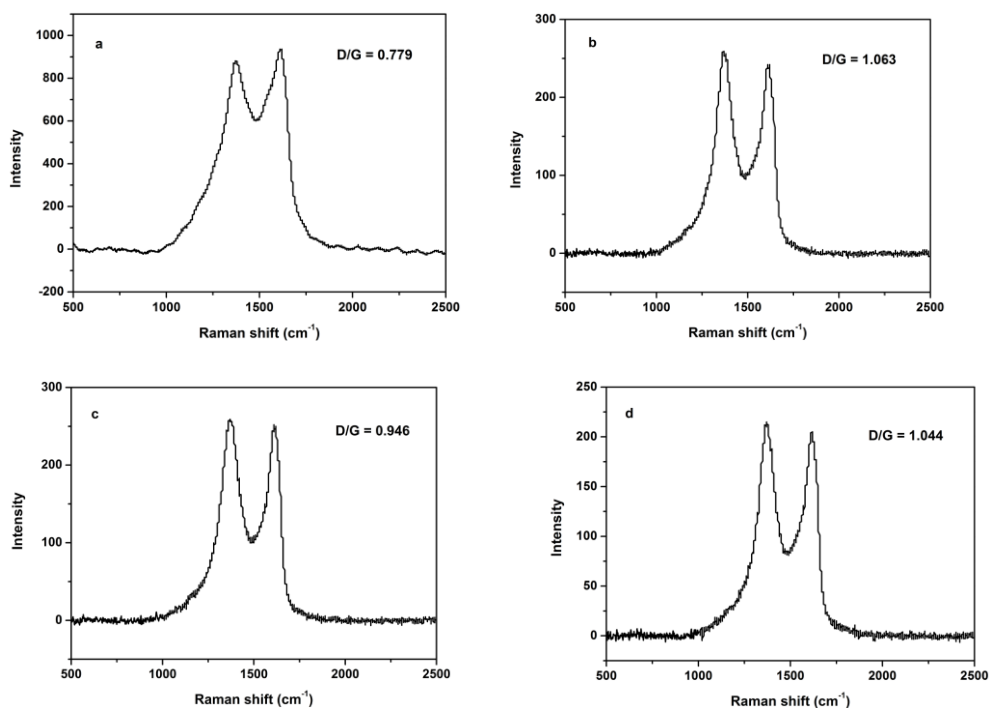

Fig. S2 Raman spectra of GO (a), Pd-Au(1:1)/RGO (b), Pd-Au(1:1)/RGO-1 (c) and Pd-Au(1:1)/RGO -2 (d).

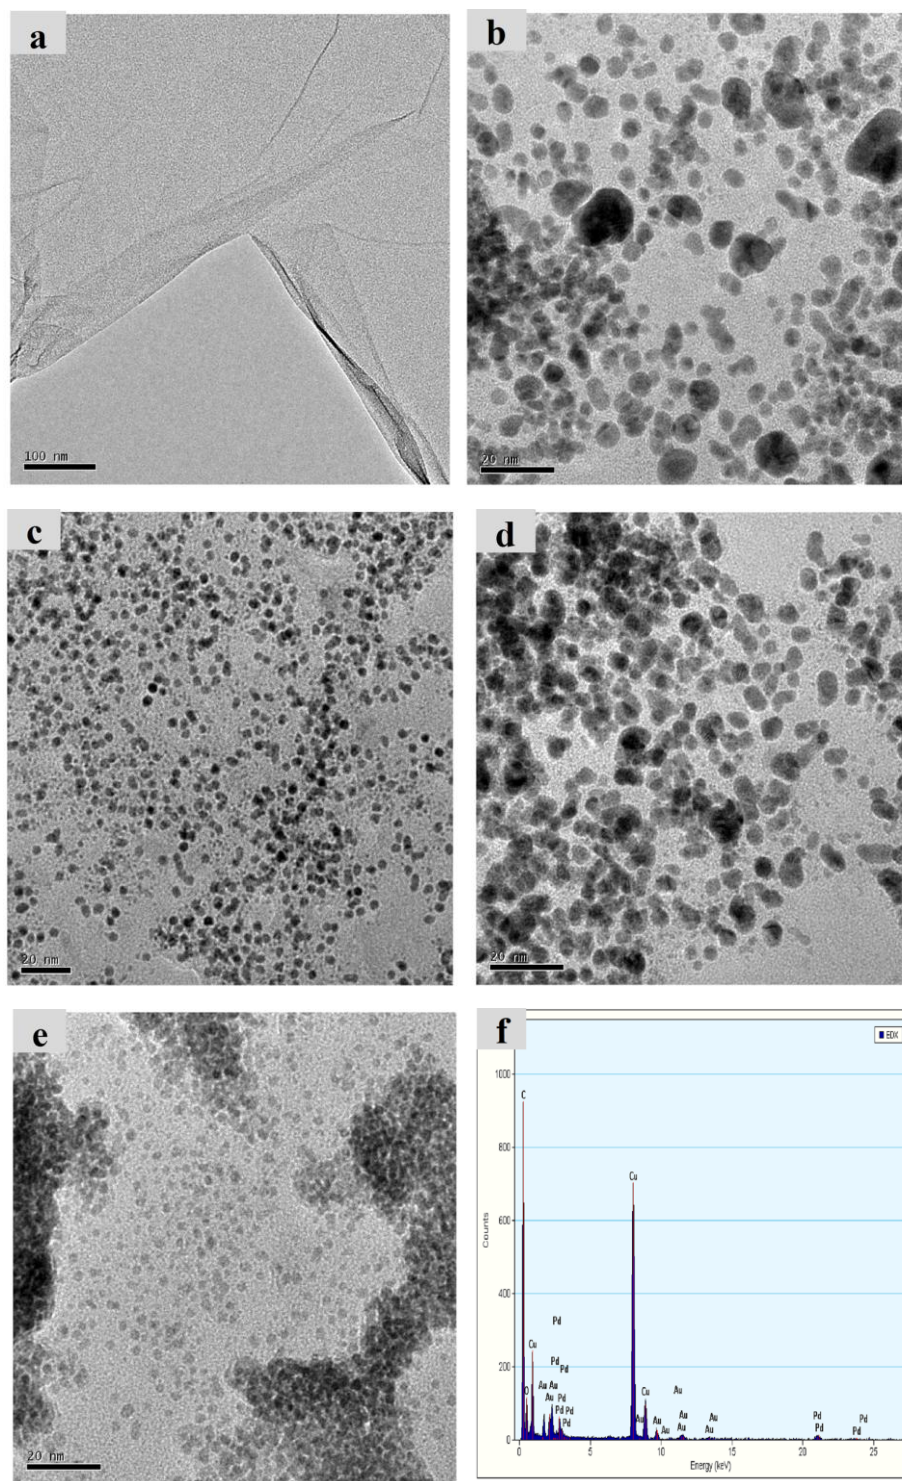

Fig. S3 TEM images of GO (a), Pd-Au(1:0.5)/GO (b), Pd-Au(1:1)/GO (c), Pd-Au(1:1.5)/GO (d) and Pd/GO (e), EDX spectrum of Pd-Au(1:1)/RGO catalyst (f).

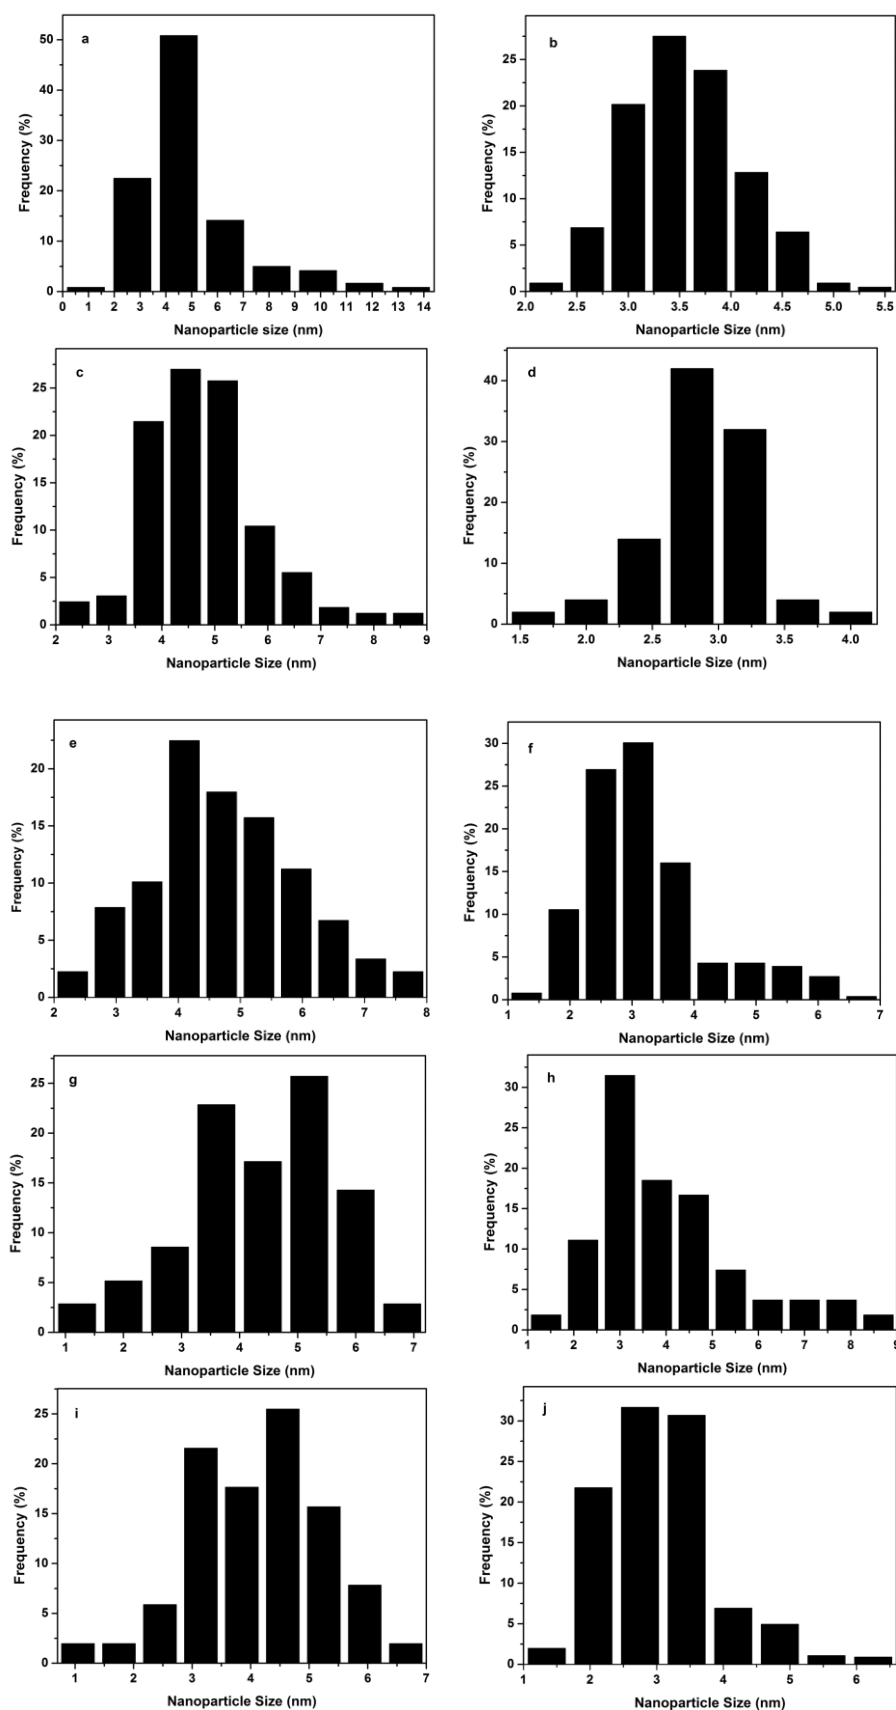

Fig. S4 Size distributions of the nanoparticle in Pd-Au(1:0.5)/GO (a), Pd-Au(1:1)/GO (b), Pd-Au(1:1.5)/GO (c), Pd/GO (d), Pd-Au(1:0.5)/RGO (e), Pd-Au(1:1)/RGO (f), Pd-Au(1:1.5)/RGO (g), Pd/RGO (h), Pd-Au(1:1)/RGO-1 (i) and Pd-Au(1:1)/RGO-2 (j).

Table S1 the conversion of Pd and Au during the reaction of using GO to reducing Pd and Au precursors.

|                  | Conversion of Pd (%) | Conversion of Au (%) |
|------------------|----------------------|----------------------|
| Pd-Au(1:0.5)/GO  | 76.84                | 78.63                |
| Pd-Au(1:1)/ GO   | 77.37                | 80.08                |
| Pd-Au(1:1.5)/ GO | 77.97                | 79.47                |
| Pd/GO            | 76.93                |                      |
